# Supplementary material for: One-step fabrication and photocatalytic performance of sea urchin-like CuO/ZnO heterostructures
Source: Royal Society of Chemistry journal article supplement (doi:10.1039/d2nj01046a), 2022-01-01
Supplement: d2nj01046a1.pdf [file d2nj01046a1.pdf]

### Supporting information

**Journal:** New Journal of Chemistry

**Manuscript ID:** NJ-ART-03-2022-001046

**Title:** “One-step fabrication and photocatalytic performance of sea urchin-like CuO/ZnO heterostructures”

**Author(s):** Hongjie Tan, Zuzhen Huang, Yun Wang, Lexian Sang, Lichang Wang, Fuchao Jia, Fazhe Sun\*, Xiaomei Wang \*

School of physics and optoelectronic engineering, Shandong University of Technology

Zibo 255000

E-mail address: xiaomeiwan@sdut.edu.cn (X, Wang).

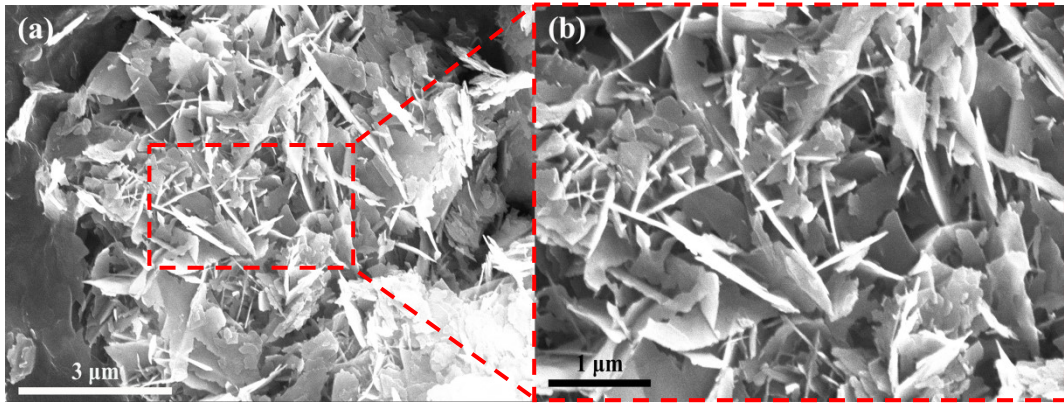

Fig.S1 FESEM image of nano-composite after adding ammonia

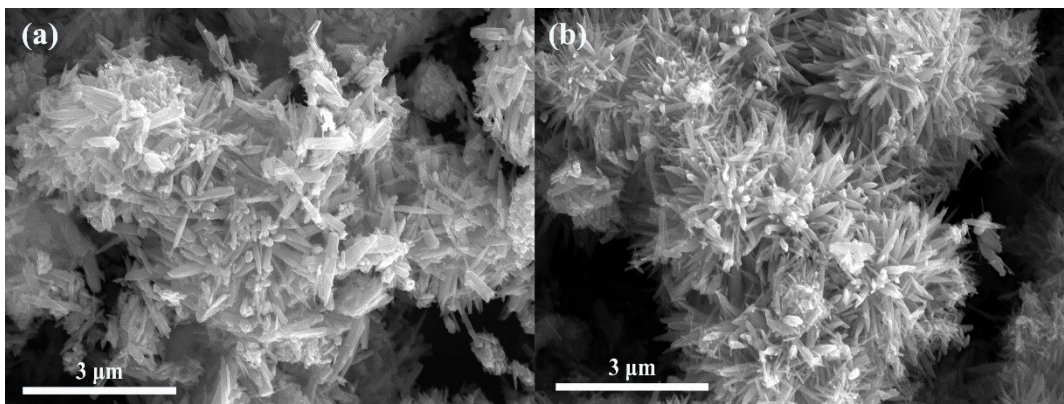

Fig.S2 FESEM images of nanocomposites with the dripping rates of one drop every 4 seconds (a) and one drop every 8 seconds (b)

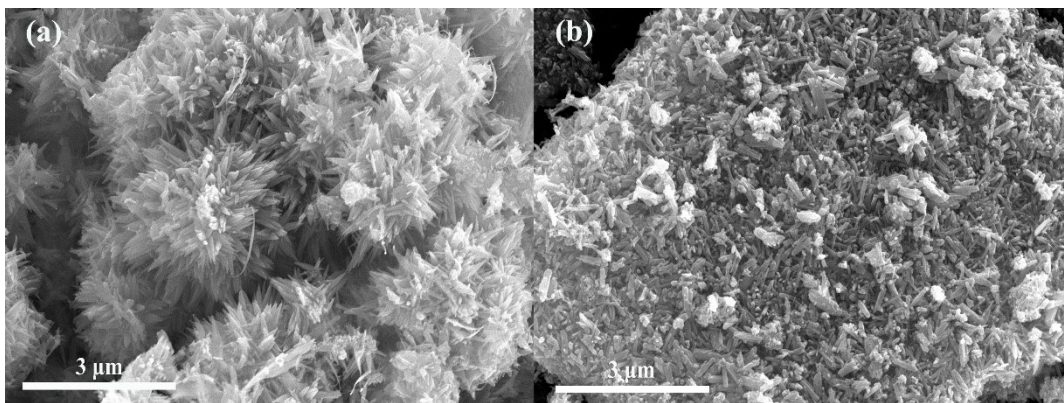

Fig.S3 FESEM images of nanocomposites with the reaction temperatures of 50 degrees (a) and 100 degrees (b)
